# Supplementary material
Source: publisher site journal article supplement (http://www.kjim.org/upload/media/kjim-2022-201-Supplementary-Table-4.pdf)
Supplement: Supplementary file 1 [file kjim-2022-201-Supplementary-Table-4.pdf]

**Supplementary Table 4. Baseline characteristics of mechanically ventilated COVID-19 patients**

| Variable                                            | Before PS matching                   |                                    |                | After PS matching <sup>a)</sup>      |                                     |                |
|-----------------------------------------------------|--------------------------------------|------------------------------------|----------------|--------------------------------------|-------------------------------------|----------------|
|                                                     | Corticosteroid<br>≤ 14 days (n = 62) | Corticosteroid<br>> 14 days (n=99) | <i>p</i> value | Corticosteroid<br>≤ 14 days (n = 57) | Corticosteroid<br>>14 days (n = 57) | <i>p</i> value |
| Age, yr                                             | 71.5 (62–78)                         | 68 (59–74)                         | 0.012          | 71 (62–78)                           | 66 (52–71)                          | 0.001          |
| Male                                                | 34 (54.8)                            | 61 (61.6)                          | 0.493          | 31 (54.4)                            | 41 (71.9)                           | 0.081          |
| Body mass index, kg/m <sup>2</sup>                  | 24.9 (22.5–27.3)                     | 25.7 (22.8–28.9)                   | 0.039          | 25.0 (22.6–27.6)                     | 26.8 (22.9–29.4)                    | 0.023          |
| Time from symptom onset<br>to admission, days       | 5.5 (3–9)                            | 6 (2–8)                            | 0.739          | 6 (3–9)                              | 6 (5–9)                             | 0.504          |
| Time from admission to<br>intubation, days          | 2 (1–5)                              | 2 (1–4)                            | 0.569          | 2 (1–4)                              | 2 (1–4)                             | 0.460          |
| Comorbidities                                       | 46 (74.2)                            | 73 (73.7)                          | 1.000          | 42 (73.7)                            | 42 (73.7)                           | 1.000          |
| Hypertension                                        | 32 (51.6)                            | 58 (58.6)                          | 0.481          | 29 (50.9)                            | 32 (56.1)                           | 0.707          |
| Diabetes                                            | 23 (37.1)                            | 44 (44.4)                          | 0.450          | 21 (36.8)                            | 27 (47.4)                           | 0.343          |
| Chronic lung disease                                | 3 (4.8)                              | 1 (1.0)                            | 0.160          | 3 (5.3)                              | 0                                   | 0.243          |
| Chronic kidney disease                              | 3 (4.8)                              | 2 (2.0)                            | 0.374          | 2 (3.5)                              | 2 (3.5)                             | 1.000          |
| Chronic liver disease                               | 3 (4.8)                              | 2 (2.0)                            | 0.374          | 3 (5.3)                              | 2 (3.5)                             | 1.000          |
| Cardiovascular disease                              | 5 (8.1)                              | 1 (1.0)                            | 0.032          | 4 (7.0)                              | 0                                   | 0.118          |
| Cerebrovascular disease                             | 4 (6.5)                              | 7 (7.1)                            | 1.000          | 4 (7.0)                              | 4 (7.0)                             | 1.000          |
| Malignancy                                          | 6 (9.7)                              | 8 (8.1)                            | 0.950          | 6 (10.5)                             | 5 (8.8)                             | 1.000          |
| Vital signs                                         |                                      |                                    |                |                                      |                                     |                |
| Systolic blood pressure,<br>mmHg                    | 131 (120–146)                        | 140 (124–152)                      | 0.082          | 130 (120–146)                        | 144 (132–155)                       | 0.013          |
| Diastolic blood pressure,<br>mmHg                   | 76 (65–84)                           | 78 (68–89)                         | 0.117          | 77 (65–84)                           | 78 (70–89)                          | 0.151          |
| Heart rate, /min                                    | 92 (76–105)                          | 89 (76–102)                        | 0.660          | 92 (76–105)                          | 88 (78–102)                         | 0.892          |
| Respiratory rate, /min                              | 21 (20–25)                           | 22 (20–26)                         | 0.627          | 21 (20–25)                           | 20 (20–25)                          | 0.522          |
| Body temperature, °C                                | 36.8 (36.5–37.4)                     | 36.8 (36.5–37.6)                   | 0.848          | 36.9 (36.5–37.4)                     | 36.8 (36.4–37.4)                    | 0.568          |
| PaO <sub>2</sub> /FiO <sub>2</sub> at admission     | 133 (87–194)                         | 108 (76–155)                       | 0.097          | 138 (93–200)                         | 104 (75–148)                        | 0.040          |
| Chest X-ray at admission                            |                                      |                                    |                |                                      |                                     |                |
| Normal                                              | 1 (1.6)                              | 2 (2.0)                            |                | 1 (1.8)                              | 1 (1.8)                             |                |
| Unilateral                                          | 9 (14.5)                             | 9 (9.1)                            |                | 8 (14.0)                             | 4 (7.0)                             |                |
| Bilateral                                           | 23 (37.1)                            | 45 (45.5)                          |                | 21 (36.8)                            | 28 (49.1)                           |                |
| Multifocal                                          | 29 (46.8)                            | 43 (43.4)                          |                | 27 (47.4)                            | 24 (42.1)                           |                |
| Treatment                                           |                                      |                                    |                |                                      |                                     |                |
| Remdesivir                                          | 33 (53.2)                            | 64 (64.6)                          | 0.202          | 32 (56.1)                            | 41 (71.9)                           | 0.118          |
| Vasopressor                                         | 27 (43.5)                            | 53 (53.5)                          | 0.284          | 26 (45.6)                            | 38 (66.7)                           | 0.038          |
| Renal replacement therapy                           | 15 (24.2)                            | 20 (20.2)                          | 0.688          | 14 (24.6)                            | 10 (17.5)                           | 0.491          |
| Neuromuscular blocker                               | 40 (64.5)                            | 79 (79.8)                          | 0.049          | 36 (63.2)                            | 50 (87.7)                           | 0.005          |
| Prone positioning                                   | 5 (8.1)                              | 17 (17.2)                          | 0.161          | 5 (8.8)                              | 13 (22.8)                           | 0.072          |
| ECMO                                                | 5 (8.1)                              | 25 (25.3)                          | 0.012          | 5 (8.8)                              | 19 (33.3)                           | 0.003          |
| Maximal dose of<br>corticosteroid, mg <sup>b)</sup> | 32 (32–32)                           | 64 (32–80)                         | < 0.001        | 32 (32–40)                           | 64 (60–90)                          | < 0.001        |

Values are presented as median (interquartile range) or number (%).

COVID-19, coronavirus disease 2019; PS, propensity score; PaO<sub>2</sub>, partial pressure of oxygen; FiO<sub>2</sub>, fraction of inspired oxygen; ECMO, extracorporeal membrane oxygenation.

<sup>a)</sup>Adjusted based on propensity score: age, sex, body mass index, time from admission to intubation, comorbidities, PaO<sub>2</sub>/FiO<sub>2</sub>, chest X-ray, remdesivir, vasopressor, renal replacement therapy, severity scale, and maximal dose of corticosteroids.

<sup>b)</sup>Doses of each corticosteroid were converted to be equivalent to 1 mg of methylprednisolone.
